# Supplementary material for: Comparative study of light- and thermal-induced degradation for both fullerene and non-fullerene-based organic solar cells
Source: Royal Society of Chemistry journal article supplement (doi:10.1039/c8se00567b), 2019-01-01
Supplement: c8se00567b1.pdf [file c8se00567b1.pdf]

## Comparative study of light and thermal induced degradation for both fullerene and non-fullerene based organic solar cells

Leiping Duan<sup>\*,†</sup>, Haimang Yi<sup>†</sup>, Yu Zhang<sup>†</sup>, Faiazul Haque<sup>†</sup>, Cheng Xu<sup>†</sup>, Ashraf Uddin<sup>\*,†</sup>

### AUTHOR ADDRESS

<sup>†</sup>School of Photovoltaic and Renewable Energy Engineering, University of New South Wales, Sydney, NSW 2052, Australia

### Corresponding authors

\*Leiping Duan ([Leiping.duan@unsw.edu.au](mailto:Leiping.duan@unsw.edu.au))

\*Ashraf Uddin ([a.uddin@unsw.edu.au](mailto:a.uddin@unsw.edu.au))

## Support information

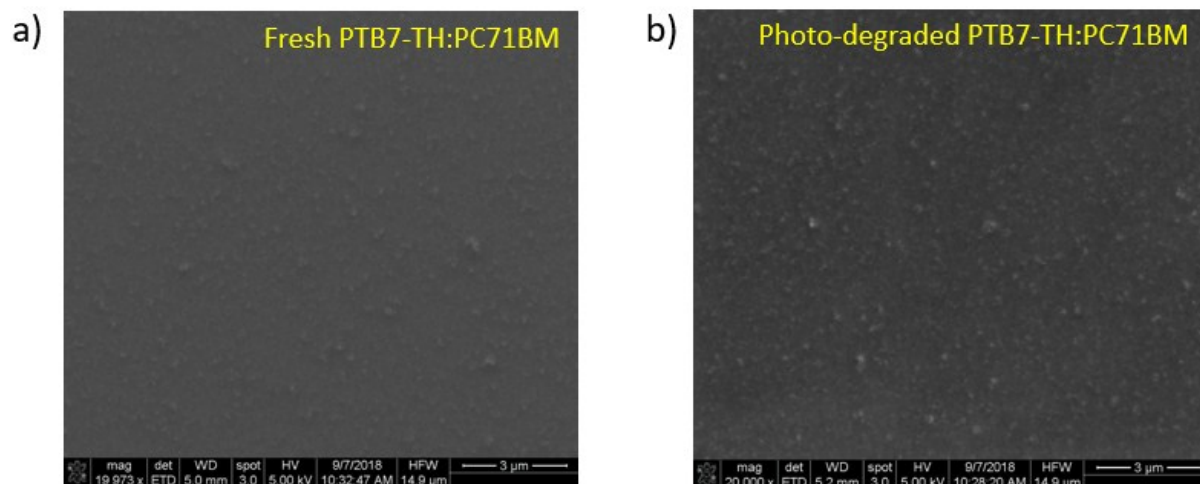

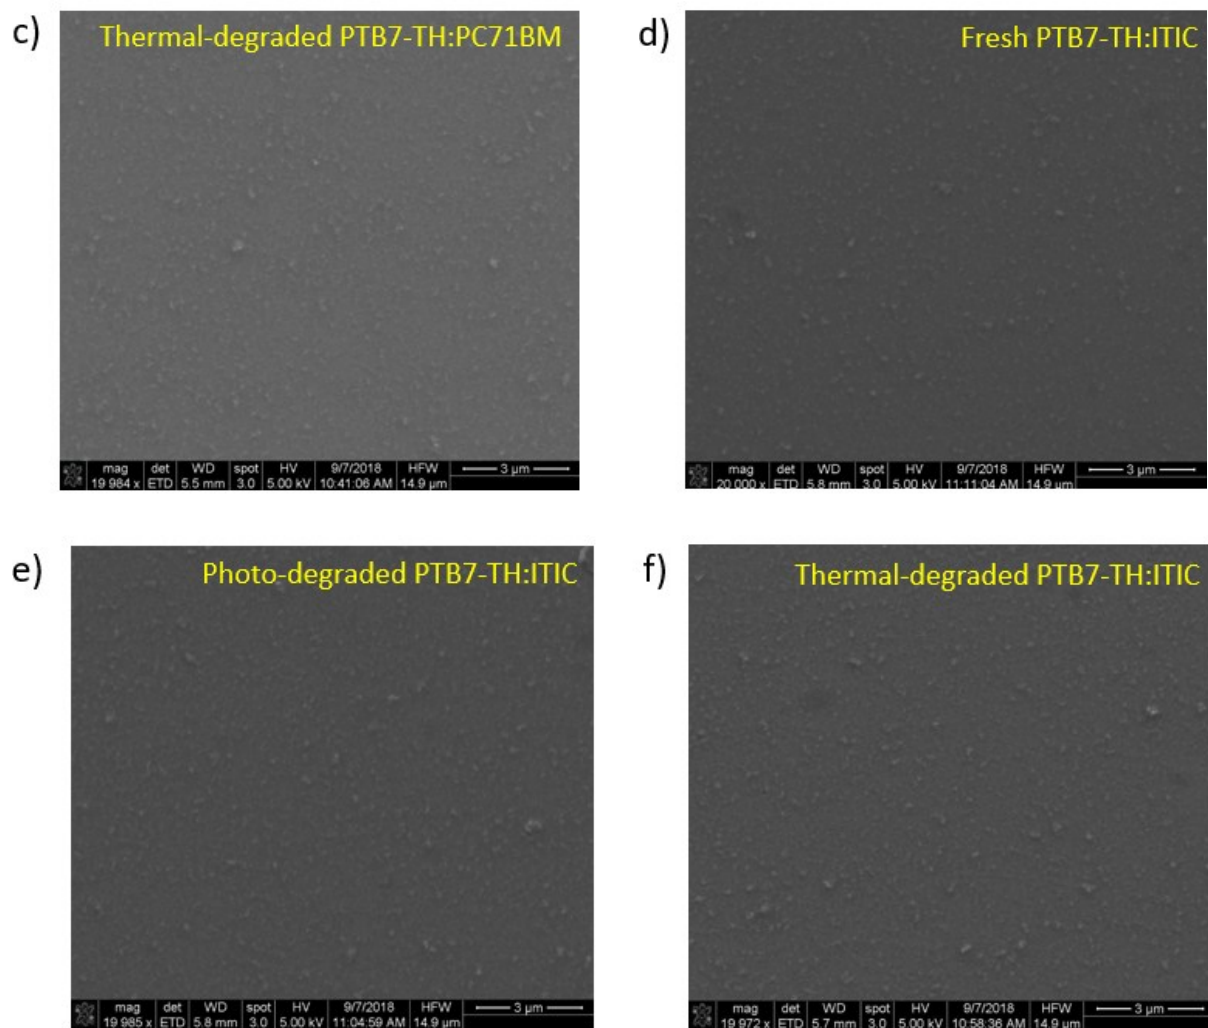

**Figure S1.** The SEM images of both PTB7-Th:PC<sub>71</sub>BM fullerene and PTB7-Th:ITIC non-fullerene based fresh, photo-degraded and thermal-degraded blend films deposited on top of ITO/ZnO surface.

**Table S1.** Photovoltaic parameters for 5 hours of continuous light illumination for burn-in photo degradation test measured under one-sun test condition (AM1.5G illumination at 100 mW cm<sup>-2</sup>) for both PTB7-Th:PC<sub>71</sub>BM fullerene and PTB7-Th:ITIC non-fullerene based devices obtained from at least 5 devices.

| <b>Degradation Time for PTB7-Th:PC<sub>71</sub>BM Devices</b> | <b>V<sub>OC</sub> (V)</b> | <b>J<sub>SC</sub> (mA/cm<sup>2</sup>)</b> | <b>FF</b> | <b>PCE</b> | <b>RSH (Ω cm<sup>2</sup>)</b> | <b>RS (Ω cm<sup>2</sup>)</b> |
|---------------------------------------------------------------|---------------------------|-------------------------------------------|-----------|------------|-------------------------------|------------------------------|
| <b>0H</b>                                                     | 0.819±0.001               | 14.76±0.94                                | 0.62±0.02 | 7.58±0.50% | 573±71                        | 5.72±0.54                    |
| <b>1H</b>                                                     | 0.793±0.003               | 14.26±0.84                                | 0.60±0.02 | 6.79±0.50% | 514±47                        | 6.05±0.68                    |
| <b>2H</b>                                                     | 0.786±0.002               | 13.83±0.78                                | 0.58±0.02 | 6.29±0.44% | 493±46                        | 7.39±0.85                    |
| <b>3H</b>                                                     | 0.782±0.003               | 13.92±0.79                                | 0.56±0.03 | 6.07±0.46% | 445±62                        | 8.06±1.10                    |
| <b>4H</b>                                                     | 0.779±0.003               | 13.41±0.70                                | 0.54±0.03 | 5.64±0.47% | 422±58                        | 8.98±1.37                    |
| <b>5H</b>                                                     | 0.778±0.003               | 13.13±0.73                                | 0.53±0.03 | 5.40±0.48% | 406±62                        | 9.65±1.60                    |
| <b>Degradation Time for PTB7-Th:ITIC Devices</b>              | <b>V<sub>OC</sub> (V)</b> | <b>J<sub>SC</sub> (mA/cm<sup>2</sup>)</b> | <b>FF</b> | <b>PCE</b> | <b>RSH (Ω cm<sup>2</sup>)</b> | <b>RS (Ω cm<sup>2</sup>)</b> |
| <b>0H</b>                                                     | 0.831±0.001               | 13.46±0.19                                | 0.60±0.01 | 6.72±0.15% | 648 ± 51                      | 8.25±0.54                    |
| <b>1H</b>                                                     | 0.790±0.005               | 12.33±0.16                                | 0.49±0.02 | 4.78±0.17% | 397 ± 22                      | 10.68±0.45                   |
| <b>2H</b>                                                     | 0.788±0.004               | 11.78±0.18                                | 0.47±0.01 | 4.34±0.03% | 367 ± 14                      | 12.02±0.18                   |
| <b>3H</b>                                                     | 0.784±0.005               | 11.71±0.17                                | 0.46±0.01 | 4.21±0.05% | 345 ± 15                      | 12.38±0.27                   |
| <b>4H</b>                                                     | 0.782±0.007               | 11.31±0.15                                | 0.45±0.01 | 3.99±0.09% | 338 ± 12                      | 13.27±0.32                   |
| <b>5H</b>                                                     | 0.785±0.007               | 11.20±0.15                                | 0.45±0.01 | 3.98±0.07% | 335 ± 14                      | 13.36±0.27                   |

**Table S2.** Photovoltaic parameters for 5 hours of continuous 85 °C heating for burn-in thermal degradation test measured under one-sun test condition (AM1.5G illumination at 100 mW cm<sup>-2</sup> for both PTB7-Th:PC<sub>71</sub>BM fullerene and PTB7-Th:ITIC non-fullerene based devices obtained from at least 5 devices.

| <b>Degradation Time for PTB7-Th:PC<sub>71</sub>BM Devices</b> | <b>V<sub>OC</sub> (V)</b> | <b>J<sub>sc</sub> (mA/cm<sup>2</sup>)</b> | <b>FF</b>   | <b>PCE</b>   | <b>RSH (Ω cm<sup>2</sup>)</b> | <b>RS (Ω cm<sup>2</sup>)</b> |
|---------------------------------------------------------------|---------------------------|-------------------------------------------|-------------|--------------|-------------------------------|------------------------------|
| <b>0H</b>                                                     | 0.821 ± 0.004             | 14.48 ± 0.71                              | 0.61 ± 0.01 | 7.25 ± 0.24% | 522 ± 50                      | 5.98 ± 0.25                  |
| <b>1H</b>                                                     | 0.818 ± 0.010             | 11.80 ± 0.84                              | 0.47 ± 0.04 | 4.58 ± 0.49% | 251 ± 45                      | 9.46 ± 1.30                  |
| <b>2H</b>                                                     | 0.821 ± 0.005             | 11.98 ± 0.87                              | 0.49 ± 0.02 | 4.85 ± 0.44% | 271 ± 18                      | 9.07 ± 0.84                  |
| <b>3H</b>                                                     | 0.801 ± 0.009             | 12.42 ± 0.90                              | 0.50 ± 0.04 | 4.95 ± 0.57% | 275 ± 27                      | 8.94 ± 1.37                  |
| <b>4H</b>                                                     | 0.812 ± 0.005             | 12.34 ± 0.96                              | 0.51 ± 0.02 | 5.14 ± 0.53% | 303 ± 20                      | 9.02 ± 1.23                  |
| <b>5H</b>                                                     | 0.800 ± 0.005             | 12.44 ± 0.94                              | 0.52 ± 0.02 | 5.22 ± 0.50% | 325 ± 17                      | 8.50 ± 1.01                  |
| <b>Degradation Time for PTB7-Th:ITIC Devices</b>              | <b>V<sub>OC</sub> (V)</b> | <b>J<sub>sc</sub> (mA/cm<sup>2</sup>)</b> | <b>FF</b>   | <b>PCE</b>   | <b>RSH (Ω cm<sup>2</sup>)</b> | <b>RS (Ω cm<sup>2</sup>)</b> |
| <b>0H</b>                                                     | 0.831 ± 0.002             | 13.75 ± 0.49                              | 0.60 ± 0.00 | 6.84 ± 0.30% | 666±13                        | 8.47 ± 0.32                  |
| <b>1H</b>                                                     | 0.831 ± 0.003             | 9.70 ± 0.41                               | 0.55 ± 0.01 | 4.41 ± 0.29% | 342±39                        | 9.21 ± 0.41                  |
| <b>2H</b>                                                     | 0.829 ± 0.002             | 9.71 ± 0.36                               | 0.53 ± 0.01 | 4.30 ± 0.24% | 299±17                        | 9.89 ± 0.43                  |
| <b>3H</b>                                                     | 0.814 ± 0.004             | 9.90 ± 0.32                               | 0.53 ± 0.01 | 4.30 ± 0.20% | 280±20                        | 8.96 ± 0.37                  |
| <b>4H</b>                                                     | 0.815 ± 0.005             | 9.88 ± 0.30                               | 0.53 ± 0.01 | 4.26 ± 0.19% | 274±24                        | 9.65 ± 0.54                  |
| <b>5H</b>                                                     | 0.812 ± 0.005             | 10.02 ± 0.27                              | 0.53 ± 0.01 | 4.30 ± 0.17% | 280±25                        | 9.84 ± 0.55                  |

**Table S3.** Parameters including effective voltage  $V_{\text{eff}}$ , Series resistance  $R_s$  and voltage loss term  $B$  that used to calculate the carrier recombination resistance for both PTB7-Th:PC<sub>71</sub>BM fullerene and PTB7-Th:ITIC non-fulleren based fresh, photo-degraded and thermal-degraded devices. ( $V_{\text{eff}}$  is extracted from the Figure 9 that equals to the voltage value for the minimum differential diode ideality factor and  $R_s$  is measured by EIS characterisaiton under the dark condion)

| <b>Devices</b>                  | <b><math>V_{\text{eff}}</math> (V)</b> | <b><math>R_s</math> (<math>\Omega \text{ cm}^2</math>)</b> | <b><math>B</math> (V)</b> |
|---------------------------------|----------------------------------------|------------------------------------------------------------|---------------------------|
| Fresh PTB7-Th:PC71BM            | 0.752                                  | 0.91                                                       | 0.013                     |
| Photo-degraded PTB7-Th:PC71BM   | 0.681                                  | 0.93                                                       | 0.012                     |
| Thermal-degraded PTB7-Th:PC71BM | 0.772                                  | 1.08                                                       | 0.013                     |
| Fresh PTB7-Th:ITIC              | 0.691                                  | 1.10                                                       | 0.015                     |
| Photo-degraded PTB7-Th:ITIC     | 0.772                                  | 0.83                                                       | 0.009                     |
| Thermal-degraded PTB7-Th:ITIC   | 0.722                                  | 1.02                                                       | 0.010                     |
